# Supplementary material for: A two-dimensional quinazoline based covalent organic framework with a suitable direct gap and superior optical absorption for photovoltaic applications
Source: Royal Society of Chemistry journal article supplement (doi:10.1039/c9ta12136f), 2020-01-01
Supplement: c9ta12136f1.pdf [file c9ta12136f1.pdf]

Supporting Information for ‘A two-dimensional quinazoline  
based covalent organic framework with a suitable direct gap and  
superior optical absorption for photovoltaic applications’

Bo Xu<sup>a, c, \*</sup>, Shenchang Li<sup>a</sup>, Han Jiao<sup>a</sup>, Jiang Yin<sup>b, c</sup>, Zhiguo Liu<sup>b, c</sup>,

Wenying Zhong<sup>a, \*</sup>

<sup>†</sup> School of Science and Key Laboratory of Biomedical Functional Materials, China  
Pharmaceutical University, Nanjing 211198, China.

<sup>§</sup> National Laboratory of Solid State Microstructures and Department of Materials  
Science and Engineering, College of Engineering and Applied Sciences, Nanjing  
University, Nanjing 210093, China

<sup>‡</sup> Collaborative Innovation Center of Advanced Microstructures, Nanjing University,  
Nanjing, 210093, China.

E-mails: [xubo@cpu.edu.cn](mailto:xubo@cpu.edu.cn), and [wyzhong@cpu.edu.cn](mailto:wyzhong@cpu.edu.cn)

## Supporting Figures

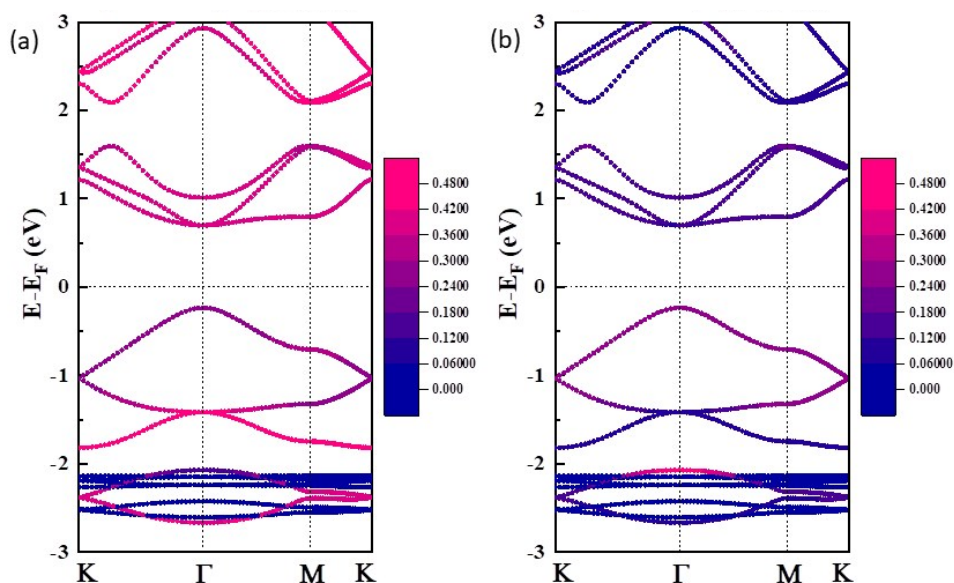

Fig. S1. Orbital projected band structures  $p_z$  orbitals of carbon (a) and nitrogen (b) of Q-COF monolayer calculated with the PBE functional, respectively.

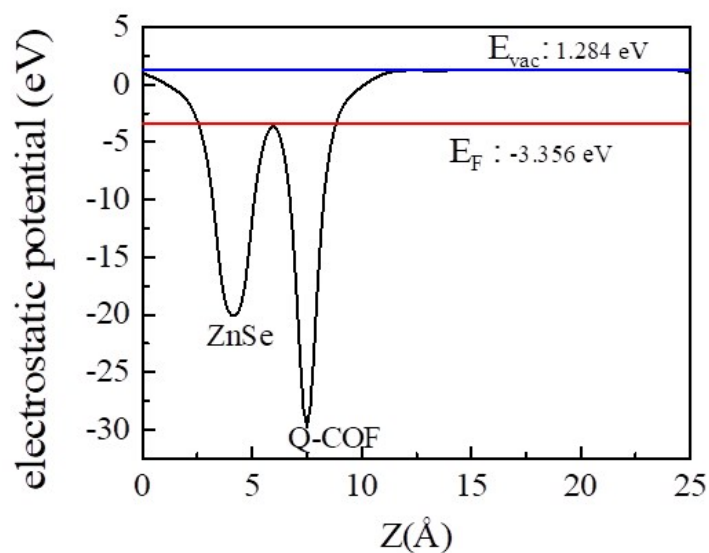

Fig. S2. Calculated electrostatic potential for Q-COF/ZnSe heterojunction. The red and blue lines denote the Fermi level and the vacuum energy level, respectively.

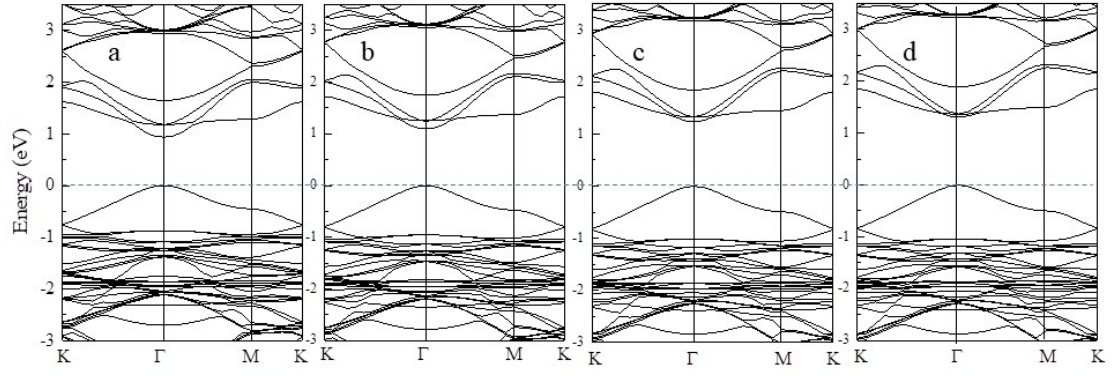

Fig. S3. Band structures of Q-COF/ZnSe heterojunction under compression strain: (a) 0; (b) -1.0%; (c) -1.8%; (d) -2.6%. The Fermi level was set to zero, as shown by the dashed line.
